# Supplementary material for: Factors associated with costs of care in community-dwelling persons with dementia from a third party payer and societal perspective: a cross-sectional study
Source: PubMed Central journal article supplement (PMC6966839; doi:10.1186/s12877-020-1414-6), 2020-01-16
Supplement: 12877_2020_1414_MOESM1_ESM.pdf [file 12877_2020_1414_MOESM1_ESM.pdf]

---

**Additional file 1. References resources**

---

| <b>Resource</b>                                                                           | <b>Reference</b>                   | <b>Reference webpage</b>                                                                                                                                                                                                                                                                                                                                                                                                                                                                                                                                                                                                                                                                                                                                                                                                                                                                                                                                                                                                                                                                                                                                                                                                                                                                                                                                                                                  |
|-------------------------------------------------------------------------------------------|------------------------------------|-----------------------------------------------------------------------------------------------------------------------------------------------------------------------------------------------------------------------------------------------------------------------------------------------------------------------------------------------------------------------------------------------------------------------------------------------------------------------------------------------------------------------------------------------------------------------------------------------------------------------------------------------------------------------------------------------------------------------------------------------------------------------------------------------------------------------------------------------------------------------------------------------------------------------------------------------------------------------------------------------------------------------------------------------------------------------------------------------------------------------------------------------------------------------------------------------------------------------------------------------------------------------------------------------------------------------------------------------------------------------------------------------------------|
| <b>Residential healthcare resources</b>                                                   |                                    |                                                                                                                                                                                                                                                                                                                                                                                                                                                                                                                                                                                                                                                                                                                                                                                                                                                                                                                                                                                                                                                                                                                                                                                                                                                                                                                                                                                                           |
| <u>Hospitalizations</u> (geriatrics, psychiatrics, internal medicine, surgery, neurology) | RIZIV/INAMI                        | <a href="http://www.inami.fgov.be/nl/themas/kost-terugbetaling/door-ziekenfonds/verzorging-ziekenhuizen/Paginas/default.aspx#.Wyu1fWhl-Uk">http://www.inami.fgov.be/nl/themas/kost-terugbetaling/door-ziekenfonds/verzorging-ziekenhuizen/Paginas/default.aspx#.Wyu1fWhl-Uk</a><br><a href="http://www.inami.fgov.be/nl/themas/kost-terugbetaling/door-ziekenfonds/verzorging-ziekenhuizen/Paginas/verpleegdagprijzen-ziekenhuizen.aspx#.Wyu3UWhl-UI">http://www.inami.fgov.be/nl/themas/kost-terugbetaling/door-ziekenfonds/verzorging-ziekenhuizen/Paginas/verpleegdagprijzen-ziekenhuizen.aspx#.Wyu3UWhl-UI</a><br><a href="https://www.uzgent.be/nl/patienten/Betaling/Paginas/Factuur.aspx">https://www.uzgent.be/nl/patienten/Betaling/Paginas/Factuur.aspx</a><br><a href="https://tct.fgov.be/webetct/etct-web/html/nl/fbho_faq.jsp">https://tct.fgov.be/webetct/etct-web/html/nl/fbho_faq.jsp</a><br><a href="https://tct.fgov.be/webetct/etct-web/anonymous?lang=nl">https://tct.fgov.be/webetct/etct-web/anonymous?lang=nl</a><br><a href="https://www.cm.be/diensten-en-voordelen/hospitalisatie/verblijf/spoeddienst">https://www.cm.be/diensten-en-voordelen/hospitalisatie/verblijf/spoeddienst</a><br><a href="http://www.riziv.fgov.be/SiteCollectionDocuments/tarief_artsen_deel02_20180101.pdf">http://www.riziv.fgov.be/SiteCollectionDocuments/tarief_artsen_deel02_20180101.pdf</a> |
| <u>Emergency room consults</u>                                                            | RIZIV/INAMI                        |                                                                                                                                                                                                                                                                                                                                                                                                                                                                                                                                                                                                                                                                                                                                                                                                                                                                                                                                                                                                                                                                                                                                                                                                                                                                                                                                                                                                           |
| <b>Community healthcare resources</b>                                                     |                                    |                                                                                                                                                                                                                                                                                                                                                                                                                                                                                                                                                                                                                                                                                                                                                                                                                                                                                                                                                                                                                                                                                                                                                                                                                                                                                                                                                                                                           |
| <u>Outpatient visits</u>                                                                  |                                    |                                                                                                                                                                                                                                                                                                                                                                                                                                                                                                                                                                                                                                                                                                                                                                                                                                                                                                                                                                                                                                                                                                                                                                                                                                                                                                                                                                                                           |
| <i>GP/geriatrician/neurologist/psychiatrist</i>                                           | RIZIV/INAMI                        | <a href="http://www.riziv.fgov.be/SiteCollectionDocuments/tarief_artsen_deel01_20180101.pdf">http://www.riziv.fgov.be/SiteCollectionDocuments/tarief_artsen_deel01_20180101.pdf</a>                                                                                                                                                                                                                                                                                                                                                                                                                                                                                                                                                                                                                                                                                                                                                                                                                                                                                                                                                                                                                                                                                                                                                                                                                       |
| <i>Physiotherapist</i>                                                                    | RIZIV/INAMI                        | <a href="http://www.riziv.fgov.be/SiteCollectionDocuments/tarief_kinesitherapeuten_20180201.pdf">http://www.riziv.fgov.be/SiteCollectionDocuments/tarief_kinesitherapeuten_20180201.pdf</a>                                                                                                                                                                                                                                                                                                                                                                                                                                                                                                                                                                                                                                                                                                                                                                                                                                                                                                                                                                                                                                                                                                                                                                                                               |
| <i>Occupational therapist</i>                                                             | RIZIV/INAMI                        | <a href="http://www.riziv.fgov.be/SiteCollectionDocuments/tarief_revalidatie_verstrekkingen_20180101.pdf">http://www.riziv.fgov.be/SiteCollectionDocuments/tarief_revalidatie_verstrekkingen_20180101.pdf</a>                                                                                                                                                                                                                                                                                                                                                                                                                                                                                                                                                                                                                                                                                                                                                                                                                                                                                                                                                                                                                                                                                                                                                                                             |
| <i>Psychologist</i>                                                                       | CM                                 | <a href="https://www.cm.be/media/PSYCHOTHERAPEUTEN_tcm47-25500.pdf">https://www.cm.be/media/PSYCHOTHERAPEUTEN_tcm47-25500.pdf</a>                                                                                                                                                                                                                                                                                                                                                                                                                                                                                                                                                                                                                                                                                                                                                                                                                                                                                                                                                                                                                                                                                                                                                                                                                                                                         |
| <u>Home help services</u>                                                                 |                                    |                                                                                                                                                                                                                                                                                                                                                                                                                                                                                                                                                                                                                                                                                                                                                                                                                                                                                                                                                                                                                                                                                                                                                                                                                                                                                                                                                                                                           |
| <i>Nurse visits</i>                                                                       | RIZIV/INAMI                        | <a href="http://www.riziv.fgov.be/SiteCollectionDocuments/tarief_verpleegkundigen_20180101_corr.pdf">http://www.riziv.fgov.be/SiteCollectionDocuments/tarief_verpleegkundigen_20180101_corr.pdf</a>                                                                                                                                                                                                                                                                                                                                                                                                                                                                                                                                                                                                                                                                                                                                                                                                                                                                                                                                                                                                                                                                                                                                                                                                       |
| <i>Home aid</i>                                                                           | Flemish Agency for Care and Health | Retrieved from contact person Flemish Agency for Care and Health (department home aid services)                                                                                                                                                                                                                                                                                                                                                                                                                                                                                                                                                                                                                                                                                                                                                                                                                                                                                                                                                                                                                                                                                                                                                                                                                                                                                                           |
| <i>Day sitting service/night-time care</i>                                                | Flemish Agency for Care and Health | <a href="https://codex.vlaanderen.be/Zoeken/Document.aspx?DID=1028730&amp;param=inhoud">https://codex.vlaanderen.be/Zoeken/Document.aspx?DID=1028730&amp;param=inhoud</a>                                                                                                                                                                                                                                                                                                                                                                                                                                                                                                                                                                                                                                                                                                                                                                                                                                                                                                                                                                                                                                                                                                                                                                                                                                 |
| <i>In-home respite care (Baluchon)</i>                                                    | Baluchon Alzheimer Belgium         | <a href="http://www.baluchon-alzheimer.be/nl/dienstverlening/kost-van-een-baluchonnage.htm">http://www.baluchon-alzheimer.be/nl/dienstverlening/kost-van-een-baluchonnage.htm</a>                                                                                                                                                                                                                                                                                                                                                                                                                                                                                                                                                                                                                                                                                                                                                                                                                                                                                                                                                                                                                                                                                                                                                                                                                         |
| <u>Accommodation</u>                                                                      |                                    |                                                                                                                                                                                                                                                                                                                                                                                                                                                                                                                                                                                                                                                                                                                                                                                                                                                                                                                                                                                                                                                                                                                                                                                                                                                                                                                                                                                                           |
| <i>Day care</i>                                                                           | Federal government                 | <a href="http://www.ejustice.just.fgov.be/cgi_loi/change_lg.pl?language=nl&amp;la=N&amp;cn=2000062232&amp;table_name=wet">http://www.ejustice.just.fgov.be/cgi_loi/change_lg.pl?language=nl&amp;la=N&amp;cn=2000062232&amp;table_name=wet</a>                                                                                                                                                                                                                                                                                                                                                                                                                                                                                                                                                                                                                                                                                                                                                                                                                                                                                                                                                                                                                                                                                                                                                             |
|                                                                                           | Partnerplan Probis 2017            | <a href="http://probis.be/sites/default/files/cases/Presentaties%20PartnerPlan%20Benchmark%202017.pdf">http://probis.be/sites/default/files/cases/Presentaties%20PartnerPlan%20Benchmark%202017.pdf</a>                                                                                                                                                                                                                                                                                                                                                                                                                                                                                                                                                                                                                                                                                                                                                                                                                                                                                                                                                                                                                                                                                                                                                                                                   |
| Blankenberge                                                                              | OCMW                               | <a href="https://www.thuiszorgzakboekje.be/site/zoeken_detail.asp?id=7074&amp;entry_id=69076&amp;rubriekid=16&amp;subrubriekid=13&amp;synoniemid=">https://www.thuiszorgzakboekje.be/site/zoeken_detail.asp?id=7074&amp;entry_id=69076&amp;rubriekid=16&amp;subrubriekid=13&amp;synoniemid=</a>                                                                                                                                                                                                                                                                                                                                                                                                                                                                                                                                                                                                                                                                                                                                                                                                                                                                                                                                                                                                                                                                                                           |
| Destelbergen                                                                              | OCMW                               | <a href="http://www.ocmw-destelbergen.be/?q=Dagverzorgingscentrum+De+Triangel">http://www.ocmw-destelbergen.be/?q=Dagverzorgingscentrum+De+Triangel</a>                                                                                                                                                                                                                                                                                                                                                                                                                                                                                                                                                                                                                                                                                                                                                                                                                                                                                                                                                                                                                                                                                                                                                                                                                                                   |
| Hasselt                                                                                   | OCMW                               | <a href="https://www.hasselt.be/nl/dagverzorgingscentrum-hogevijf-ocmw-hasselt">https://www.hasselt.be/nl/dagverzorgingscentrum-hogevijf-ocmw-hasselt</a>                                                                                                                                                                                                                                                                                                                                                                                                                                                                                                                                                                                                                                                                                                                                                                                                                                                                                                                                                                                                                                                                                                                                                                                                                                                 |
| Houthalen                                                                                 | OCMW                               | <a href="https://www.houthalen-helchteren.be/dagopvang">https://www.houthalen-helchteren.be/dagopvang</a>                                                                                                                                                                                                                                                                                                                                                                                                                                                                                                                                                                                                                                                                                                                                                                                                                                                                                                                                                                                                                                                                                                                                                                                                                                                                                                 |

|                                 |                                          |                                                                                                                                                                                                                                                                                                                                                                                                                              |
|---------------------------------|------------------------------------------|------------------------------------------------------------------------------------------------------------------------------------------------------------------------------------------------------------------------------------------------------------------------------------------------------------------------------------------------------------------------------------------------------------------------------|
| Kruikeke                        | OCMW                                     | <a href="https://www.kruikeke.be/product/96/dagopvang-voor-ouderen">https://www.kruikeke.be/product/96/dagopvang-voor-ouderen</a>                                                                                                                                                                                                                                                                                            |
| Bergen                          | CPAS                                     | <a href="https://www.cpas.mons.be/services/seniors/hebergement-et-soins/bonne-maison-de-bouzanton/services/centre-de-jour">https://www.cpas.mons.be/services/seniors/hebergement-et-soins/bonne-maison-de-bouzanton/services/centre-de-jour</a>                                                                                                                                                                              |
| Watermael                       | CPAS                                     | <a href="https://www.centresdesoinsdejour.be/centres-de-soins-de-jour/csj-du-cpas-de-watermael-boitsfort/">https://www.centresdesoinsdejour.be/centres-de-soins-de-jour/csj-du-cpas-de-watermael-boitsfort/</a>                                                                                                                                                                                                              |
| Moeskroen                       | CPAS                                     | <a href="https://www.mouscron.be/ma-ville/social/cpas/maisons-de-repos/centre-daccueil-de-jour">https://www.mouscron.be/ma-ville/social/cpas/maisons-de-repos/centre-daccueil-de-jour</a>                                                                                                                                                                                                                                    |
| Marche                          | CPAS                                     | <a href="https://www.marche.be/social/centre-public-daction-sociale-cpas/centre-daccueil-de-jour/">https://www.marche.be/social/centre-public-daction-sociale-cpas/centre-daccueil-de-jour/</a>                                                                                                                                                                                                                              |
| St.-Agatha-Berchem              | CPAS                                     | <a href="http://cpasberchem.brussels/sante-et-handicap/le-centre-de-soins-de-jour-le-tournesol-2/">http://cpasberchem.brussels/sante-et-handicap/le-centre-de-soins-de-jour-le-tournesol-2/</a>                                                                                                                                                                                                                              |
| <i>Host family respite care</i> | Flemish Agency for Care and Health       | <a href="https://codex.vlaanderen.be/Zoeken/Document.aspx?DID=1028549&amp;param=inhoud">https://codex.vlaanderen.be/Zoeken/Document.aspx?DID=1028549&amp;param=inhoud</a>                                                                                                                                                                                                                                                    |
| <i>Short-stay</i>               | Federal government<br>Zorg24 report 2017 | <a href="https://www.zorg-en-gezondheid.be/hoeveel-betaalt-een-gebruiker-voor-thuiszorg">https://www.zorg-en-gezondheid.be/hoeveel-betaalt-een-gebruiker-voor-thuiszorg</a><br><a href="http://www.ejustice.just.fgov.be/cgi_loi/change_lg.pl?language=nl&amp;la=N&amp;table_name=wet&amp;cn=2016091607">http://www.ejustice.just.fgov.be/cgi_loi/change_lg.pl?language=nl&amp;la=N&amp;table_name=wet&amp;cn=2016091607</a> |
| Gent                            | OCMW                                     | <a href="https://online.flippingbook.com/view/585432/118/">https://online.flippingbook.com/view/585432/118/</a><br><a href="http://www.ocmwgent.be/Kortverblijf.html">http://www.ocmwgent.be/Kortverblijf.html</a>                                                                                                                                                                                                           |
| Brugge                          | OCMW                                     | <a href="https://www.ocmw-brugge.be/kortverblijf#toc-price">https://www.ocmw-brugge.be/kortverblijf#toc-price</a>                                                                                                                                                                                                                                                                                                            |
| Zemst                           | OCMW                                     | <a href="https://www.ocmw-zemst.be/nl/402/content/413/kostprijs.html">https://www.ocmw-zemst.be/nl/402/content/413/kostprijs.html</a>                                                                                                                                                                                                                                                                                        |
| Kortrijk                        | OCMW                                     | <a href="https://www.kortrijk.be/zorg/kortverblijf">https://www.kortrijk.be/zorg/kortverblijf</a>                                                                                                                                                                                                                                                                                                                            |
| Merchtem                        | OCMW                                     | <a href="https://www.merchtem.be/product/522/kortverblijf">https://www.merchtem.be/product/522/kortverblijf</a>                                                                                                                                                                                                                                                                                                              |
| Charleroi                       | CPAS                                     | <a href="https://www.cpascharleroi.be/index.php/hebergement-aines/centre-de-court-sejour">https://www.cpascharleroi.be/index.php/hebergement-aines/centre-de-court-sejour</a>                                                                                                                                                                                                                                                |
| Bergen                          | CPAS                                     | <a href="https://www.cpas.mons.be/">https://www.cpas.mons.be/</a>                                                                                                                                                                                                                                                                                                                                                            |
| Bouge                           | CPAS                                     | <a href="https://www.acsol.be/?rub=services#CS">https://www.acsol.be/?rub=services#CS</a>                                                                                                                                                                                                                                                                                                                                    |
| Doornik                         | CPAS                                     | <a href="http://www.cpas-tournai.be/cpas_intranet/index.php?idpage=DET0060102">http://www.cpas-tournai.be/cpas_intranet/index.php?idpage=DET0060102</a>                                                                                                                                                                                                                                                                      |
| Erquelines                      | CPAS                                     | <a href="http://www.erquelines.be/commune/acteurs-locaux/residence-du-quartier-fleuri">http://www.erquelines.be/commune/acteurs-locaux/residence-du-quartier-fleuri</a>                                                                                                                                                                                                                                                      |

---

Informal care resources

ADL/IADL tasks

*Employable caregivers (≤65 years)*

Salary Survey KULeuven

<http://www.vclbleuven.be/wns0/Synthese%20Vacature%20KUL%20salarisenquete%202017.pdf>

|                                              |                            |                                                                                                                                                                                                                                                                                                                                                                                                                                                                                                                                            |
|----------------------------------------------|----------------------------|--------------------------------------------------------------------------------------------------------------------------------------------------------------------------------------------------------------------------------------------------------------------------------------------------------------------------------------------------------------------------------------------------------------------------------------------------------------------------------------------------------------------------------------------|
| <i>Non-employable caregivers (≥65 years)</i> | Gustavsson, et al. (2011)  | Costs of care in a mild-to-moderate Alzheimer clinical trial sample: key resources and their determinants. Alzheimer's & dementia: the journal of the Alzheimer's Association.                                                                                                                                                                                                                                                                                                                                                             |
| <u>Supervision</u>                           | Gustavsson et al. (2011)   | Costs of care in a mild-to-moderate Alzheimer clinical trial sample: key resources and their determinants. Alzheimer's & dementia: the journal of the Alzheimer's Association.                                                                                                                                                                                                                                                                                                                                                             |
|                                              | Schwarzkopf et al. (2011)  | Costs of care for dementia patients in community setting: an analysis for mild and moderate disease stage                                                                                                                                                                                                                                                                                                                                                                                                                                  |
|                                              | Leicht et al. (2011)       | Net costs of dementia by disease stage                                                                                                                                                                                                                                                                                                                                                                                                                                                                                                     |
| <hr/>                                        |                            |                                                                                                                                                                                                                                                                                                                                                                                                                                                                                                                                            |
| Non-healthcare resources                     |                            |                                                                                                                                                                                                                                                                                                                                                                                                                                                                                                                                            |
| <i>Social worker visits</i>                  | OCMW<br>Flemish Government | <a href="https://www.vlaanderen.be/nl/vlaamse-overheid/werken-bij-de-vlaamse-overheid/werken-voor-vlaanderen/salarissimulator">https://www.vlaanderen.be/nl/vlaamse-overheid/werken-bij-de-vlaamse-overheid/werken-voor-vlaanderen/salarissimulator</a><br><a href="https://www.jobpunt.be/sites/default/files/vacature/infobrochure/Infobrochure%20maat-schappelijk%20werker%20Sociale%20Dienst.pdf">https://www.jobpunt.be/sites/default/files/vacature/infobrochure/Infobrochure%20maat-schappelijk%20werker%20Sociale%20Dienst.pdf</a> |
| <i>Cleaning service</i>                      | ACLVB                      | <a href="http://www.aclvb.be/sites/default/files/aclvb/Documenten/Sectoren/loon_arbeidsvoorwaarden/services-aux-entreprises/2018/salaires_cp_121_nl.pdf">http://www.aclvb.be/sites/default/files/aclvb/Documenten/Sectoren/loon_arbeidsvoorwaarden/services-aux-entreprises/2018/salaires_cp_121_nl.pdf</a> ;<br><a href="http://www.aclvb.be/nl/pc-32201-loon-en-arbeidsvoorwaarden#lonen">http://www.aclvb.be/nl/pc-32201-loon-en-arbeidsvoorwaarden#lonen</a>                                                                           |
| <i>Home repair service</i>                   |                            |                                                                                                                                                                                                                                                                                                                                                                                                                                                                                                                                            |
| Zulte                                        | OCMW                       | <a href="http://www.ocmwzulte.be/ocmw/2543-www/2556-www.html">http://www.ocmwzulte.be/ocmw/2543-www/2556-www.html</a>                                                                                                                                                                                                                                                                                                                                                                                                                      |
| Anzegem                                      | OCMW                       | <a href="http://www.ocmwanzegem.be/website/9-www/51-www.html">http://www.ocmwanzegem.be/website/9-www/51-www.html</a>                                                                                                                                                                                                                                                                                                                                                                                                                      |
| Kruishoutem                                  | OCMW                       | <a href="http://www.kruishoutem.be/website/80-www/522-www/102-www/577-www.html?layoutType=print">http://www.kruishoutem.be/website/80-www/522-www/102-www/577-www.html?layoutType=print</a>                                                                                                                                                                                                                                                                                                                                                |
| Wanze                                        | CPAS                       | <a href="http://www.wanze.be/commune/social/cpas/services-accessibles-a-tous/petits%20travaux%20et%20jardinage">http://www.wanze.be/commune/social/cpas/services-accessibles-a-tous/petits%20travaux%20et%20jardinage</a>                                                                                                                                                                                                                                                                                                                  |
| Charleroi                                    | CPAS                       | <a href="https://www.cpascharleroi.be/fr/insertion-sociale/pole-d-economie-sociale/proxi-services">https://www.cpascharleroi.be/fr/insertion-sociale/pole-d-economie-sociale/proxi-services</a>                                                                                                                                                                                                                                                                                                                                            |
| Deerlijk                                     | OCMW                       | <a href="http://www.ocmwdeerlijk.be/website/37-www/24-www.html">http://www.ocmwdeerlijk.be/website/37-www/24-www.html</a>                                                                                                                                                                                                                                                                                                                                                                                                                  |
| Dendermonde                                  | OCMW                       | <a href="https://www.dendermonde.be/product/224/klusjesdienst">https://www.dendermonde.be/product/224/klusjesdienst</a>                                                                                                                                                                                                                                                                                                                                                                                                                    |
| <i>Meal delivery service</i>                 |                            |                                                                                                                                                                                                                                                                                                                                                                                                                                                                                                                                            |
| Berlare                                      | OCMW                       | <a href="https://www.ocmwberlare.be/maaltijden-aan-huis/">https://www.ocmwberlare.be/maaltijden-aan-huis/</a>                                                                                                                                                                                                                                                                                                                                                                                                                              |
| Brugge                                       | OCMW                       | <a href="https://www.ocmw-brugge.be/maaltijden-aan-huis">https://www.ocmw-brugge.be/maaltijden-aan-huis</a>                                                                                                                                                                                                                                                                                                                                                                                                                                |
| Tienen                                       | OCMW                       | <a href="https://ocmw.tienen.be/maaltijden-aan-huis">https://ocmw.tienen.be/maaltijden-aan-huis</a>                                                                                                                                                                                                                                                                                                                                                                                                                                        |
| Aalst                                        | OCMW                       | <a href="https://www.ocmwaalst.be/page15332317.aspx">https://www.ocmwaalst.be/page15332317.aspx</a>                                                                                                                                                                                                                                                                                                                                                                                                                                        |
| Turnhout                                     | OCMW                       | <a href="https://www.ocmwturnhout.be/nl/product_catalog/1737/maaltijden-aan-huis.html-2">https://www.ocmwturnhout.be/nl/product_catalog/1737/maaltijden-aan-huis.html-2</a>                                                                                                                                                                                                                                                                                                                                                                |
| Charleroi                                    | CPAS                       | <a href="https://www.cpascharleroi.be/index.php/soins-domicile/repas-domicile">https://www.cpascharleroi.be/index.php/soins-domicile/repas-domicile</a>                                                                                                                                                                                                                                                                                                                                                                                    |
| Bergen                                       | CPAS                       | <a href="https://www.cpas.mons.be/services/aide-sociale/aides-a-domicile/repas-a-domicile">https://www.cpas.mons.be/services/aide-sociale/aides-a-domicile/repas-a-domicile</a>                                                                                                                                                                                                                                                                                                                                                            |

|                               |                                      |                                                                                                                                                                                                                                                                                                                                                                                                                                                              |
|-------------------------------|--------------------------------------|--------------------------------------------------------------------------------------------------------------------------------------------------------------------------------------------------------------------------------------------------------------------------------------------------------------------------------------------------------------------------------------------------------------------------------------------------------------|
| Verviers                      | CPAS                                 | <a href="http://www.cpasdeverviers.be/nos-services/services-aines/repas-domicile">http://www.cpasdeverviers.be/nos-services/services-aines/repas-domicile</a>                                                                                                                                                                                                                                                                                                |
| Moeskroen                     | CPAS                                 | <a href="https://www.mouscron.be/ma-ville/social/cpas/repas-a-domicile">https://www.mouscron.be/ma-ville/social/cpas/repas-a-domicile</a>                                                                                                                                                                                                                                                                                                                    |
| Andenne                       | CPAS                                 | <a href="https://www.andenne.be/entity/cpas-service-des-repas-chauds-a-domicile/">https://www.andenne.be/entity/cpas-service-des-repas-chauds-a-domicile/</a>                                                                                                                                                                                                                                                                                                |
| <i>Transportation service</i> | OCMW - Flemish Health Insurance Fund | <a href="https://www.balen.be/product/182/vrijwilligers-gemeente-en-ocmw-minder-mobielen-centrale-aanmelden-vrijwillige-chauffeur">https://www.balen.be/product/182/vrijwilligers-gemeente-en-ocmw-minder-mobielen-centrale-aanmelden-vrijwillige-chauffeur</a><br><a href="https://www.cm.be/diensten-en-voordelen/thuiszorg/vervoer/niet-dringend-ziekenvervoer">https://www.cm.be/diensten-en-voordelen/thuiszorg/vervoer/niet-dringend-ziekenvervoer</a> |

---
